# Supplementary material for: Drastic enhancement of discotic mesomorphism induced by fluorination of the peripheral phenyl groups in triphenylene mesogens
Source: Royal Society of Chemistry journal article supplement (doi:10.1039/b716920e), 2008-01-01
Supplement: b716920e.pdf [file b716920e.pdf]

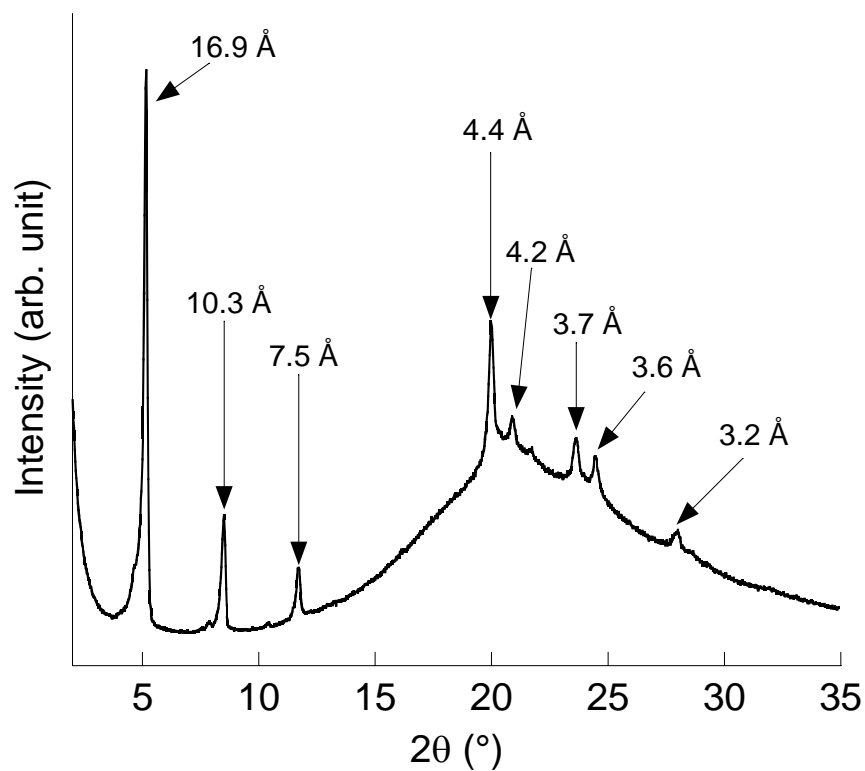

**Fig. 1** X-Ray diffraction pattern of **2F6F** at 140 °C

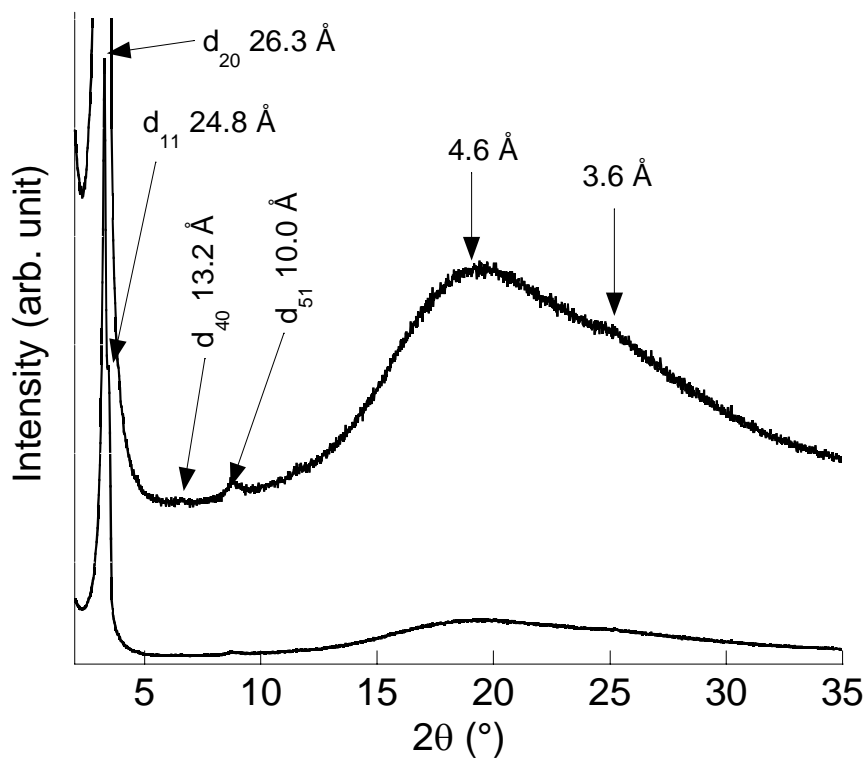

**Fig. 2** X-Ray diffraction pattern of **3F** at 220 °C

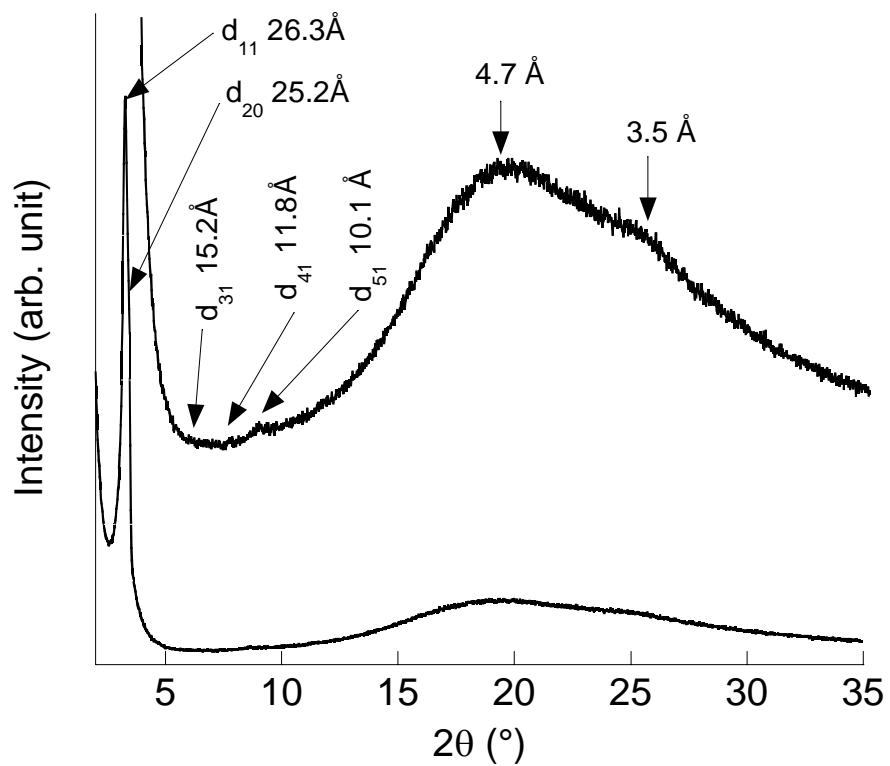

**Fig.3** X-Ray diffraction pattern of **3F** at 250 °C
